# Supplementary material for: CO2as oxidant: an unusual light-assisted catalyst free oxidation of aldehydes to acids under mild conditions
Source: Royal Society of Chemistry journal article supplement (doi:10.1039/d1cc06057k), 2022-01-01
Supplement: d1cc06057k1.pdf [file d1cc06057k1.pdf]

## ***CO<sub>2</sub> as oxidant: an unusual light-assisted catalyst free oxidation of aldehydes to acids under mild conditions***

Shafiur Rehman Khan,<sup>1</sup> Sandhya Saini,<sup>1,2</sup> K. Naresh,<sup>3</sup> Alka Kumari,<sup>3</sup> Vineet Aniya,<sup>3</sup> Praveen K Khatri,<sup>1</sup> Anjan Ray<sup>4</sup> and Suman L Jain<sup>1\*</sup>

<sup>1</sup>Chemical & Material Sciences Division, CSIR-Indian Institute of Petroleum, Haridwar Road, Mohkampur, Dehradun-248005, India.

<sup>2</sup>Academy of Scientific and Innovative Research, New Delhi-110001, India.

<sup>3</sup>Process Engineering Technology Transfer Division, CSIR-Indian Institute of Chemical Technology, Hyderabad-500007, India

<sup>4</sup>Director, CSIR-Indian Institute of Petroleum, Haridwar Road, Mohkampur, Dehradun-248005, India.

\*Corresponding Author: [suman@iip.res.in](mailto:suman@iip.res.in); Tel: +911352525788

### **Table of Contents**

**<sup>1</sup>H & <sup>13</sup>C NMR spectra of carboxylated products (Figure S1-S18)..... S2-S10**

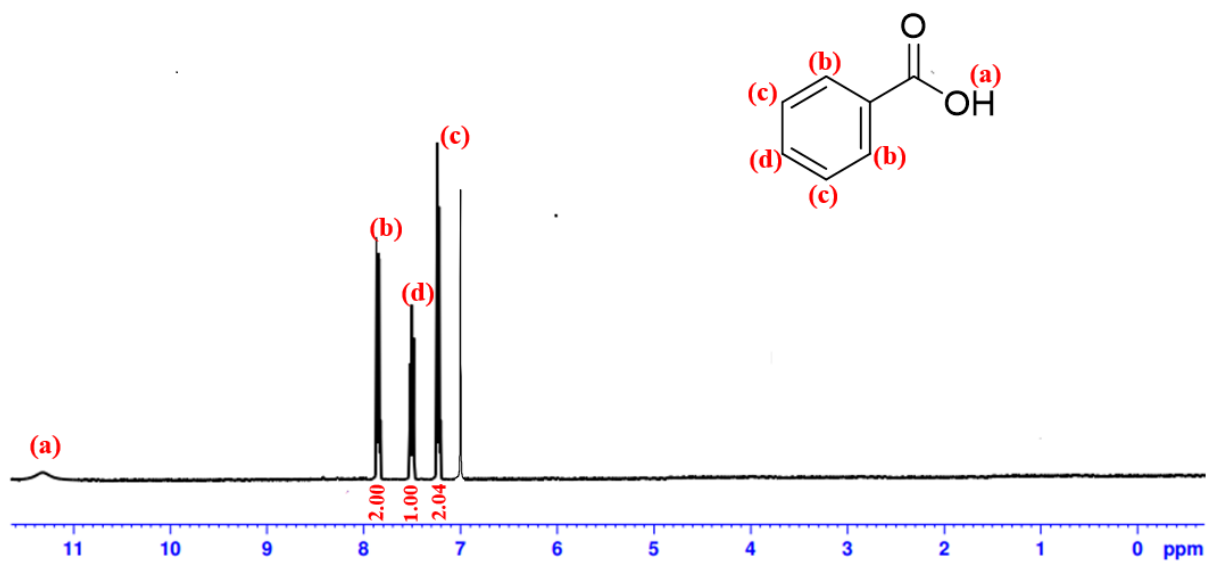

Figure S1. <sup>1</sup>H NMR spectrum of benzoic acid (Table 1, entry1)

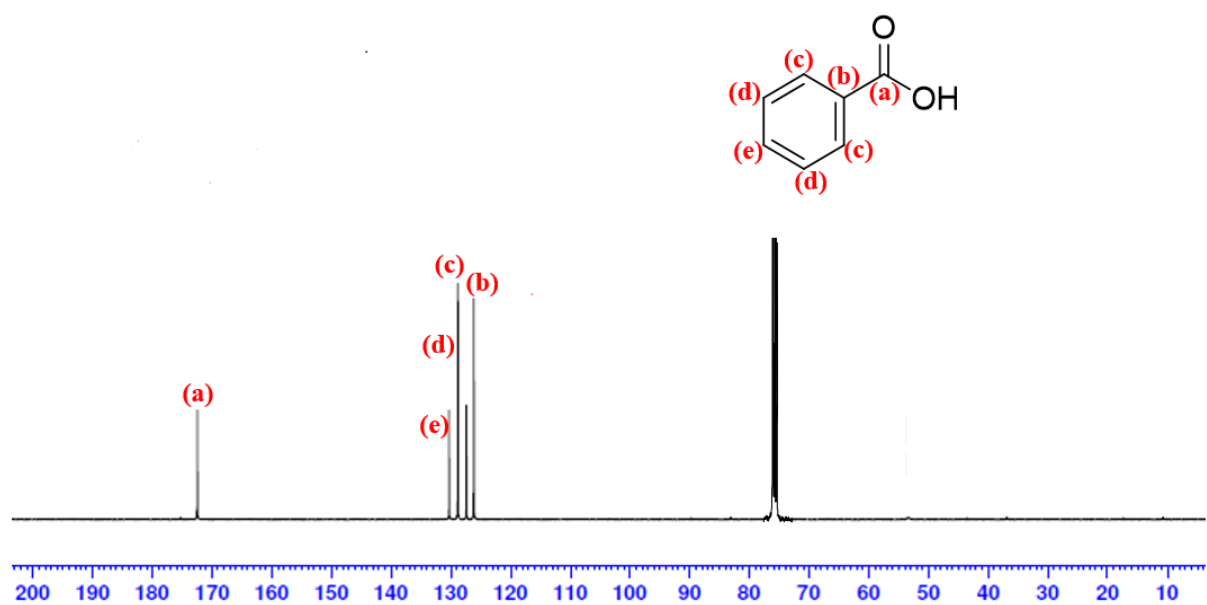

Figure S2. <sup>13</sup>C NMR spectrum of benzoic acid (Table 1, entry1)

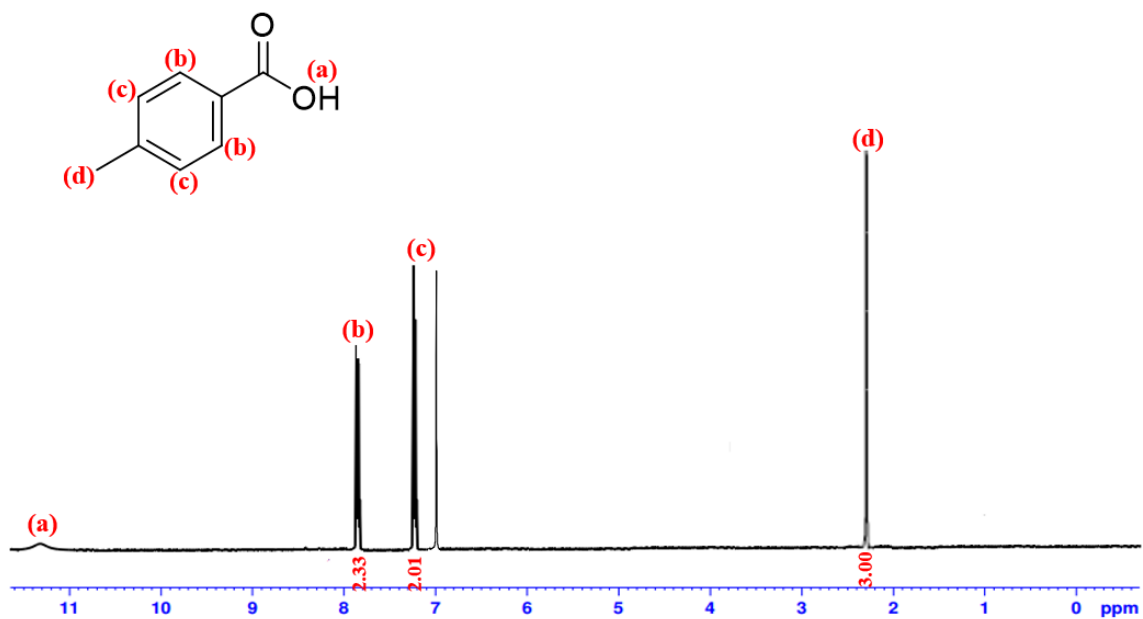

Figure S3. <sup>1</sup>H NMR spectrum of p-toluic acid (Table 1, entry 2)

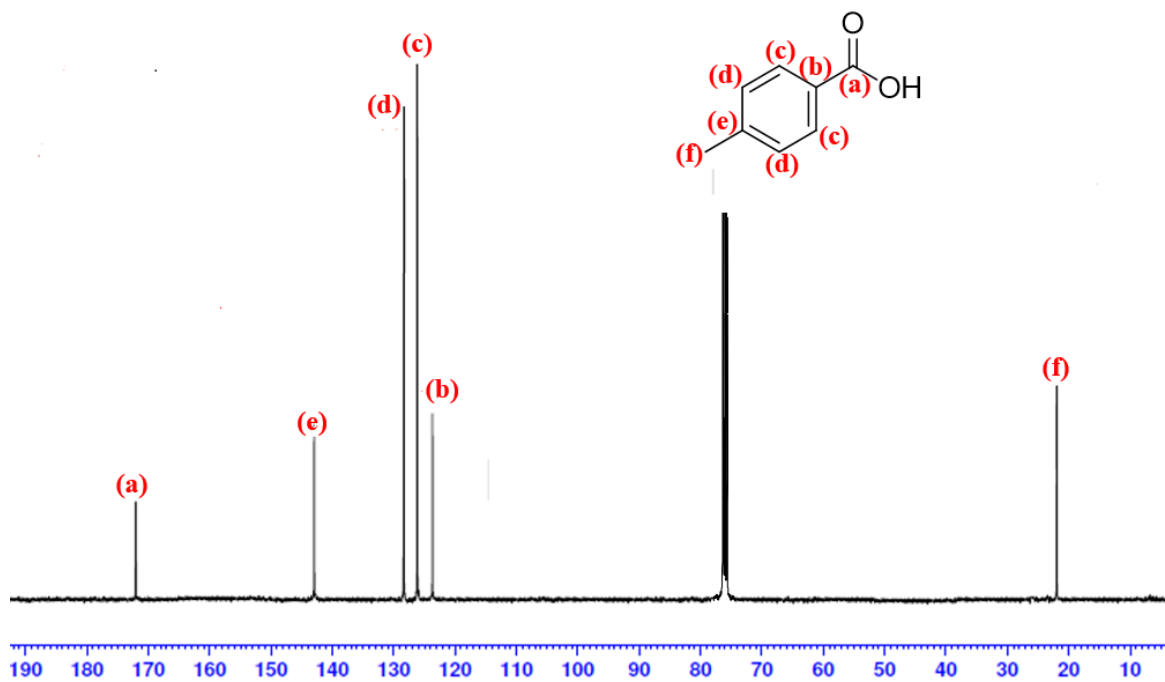

Figure S4. <sup>13</sup>C NMR spectrum of p-toluic acid (Table 1, entry 2)

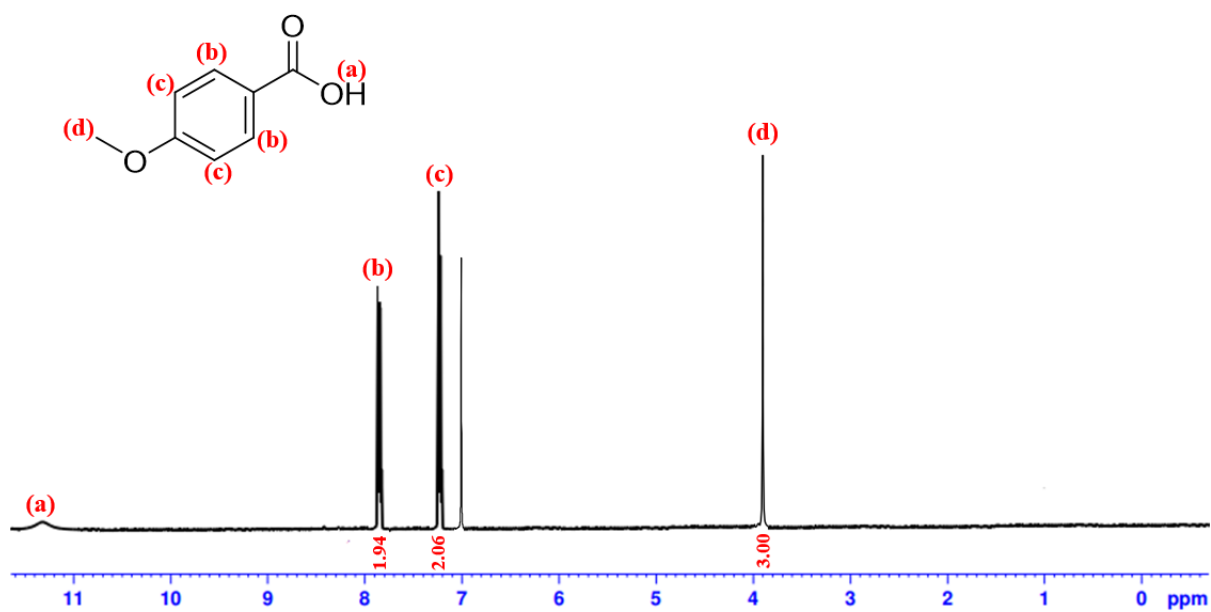

Figure S5. <sup>1</sup>H NMR spectrum of p-methoxybenzoic acid (Table 1, entry3)

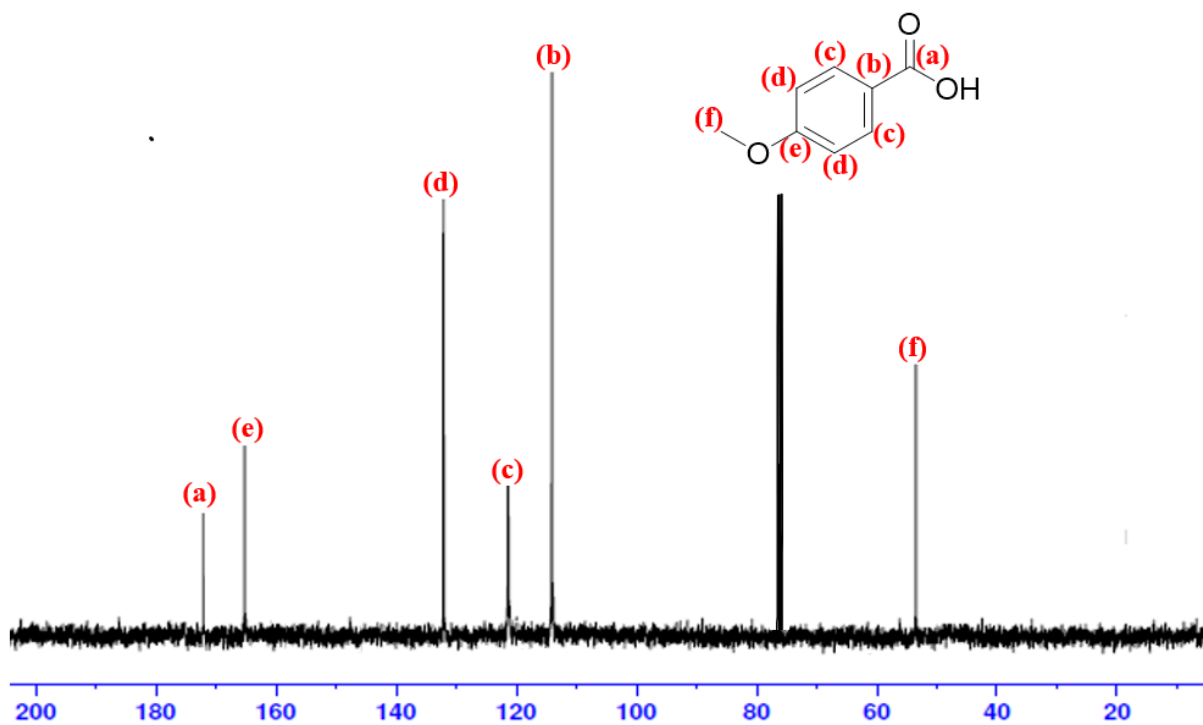

Figure S6. <sup>13</sup>C NMR spectrum of p-methoxybenzoic acid (Table 1, entry3)

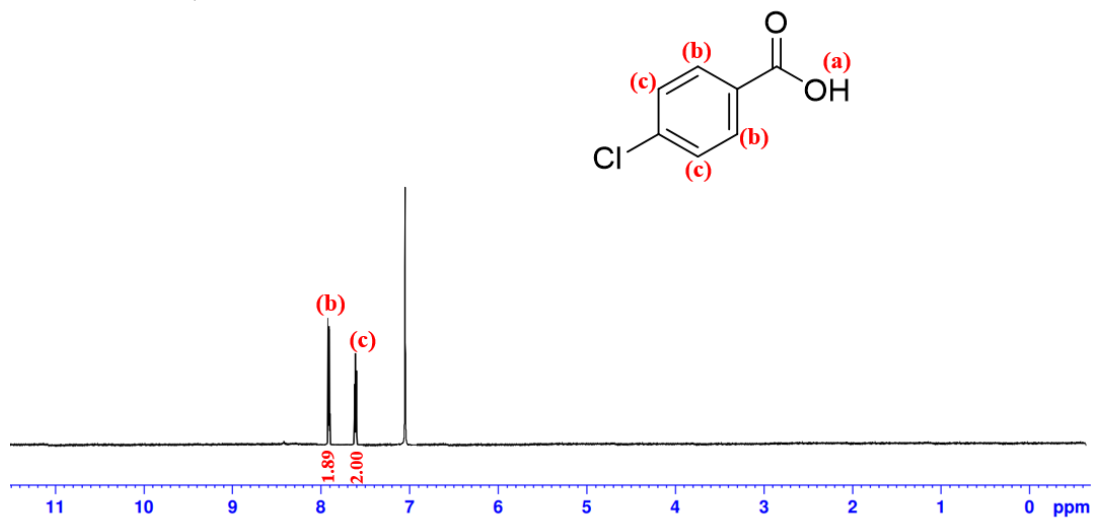

Figure S7. <sup>1</sup>H NMR spectrum of p-chlorobenzoic acid (Table 1, entry4)

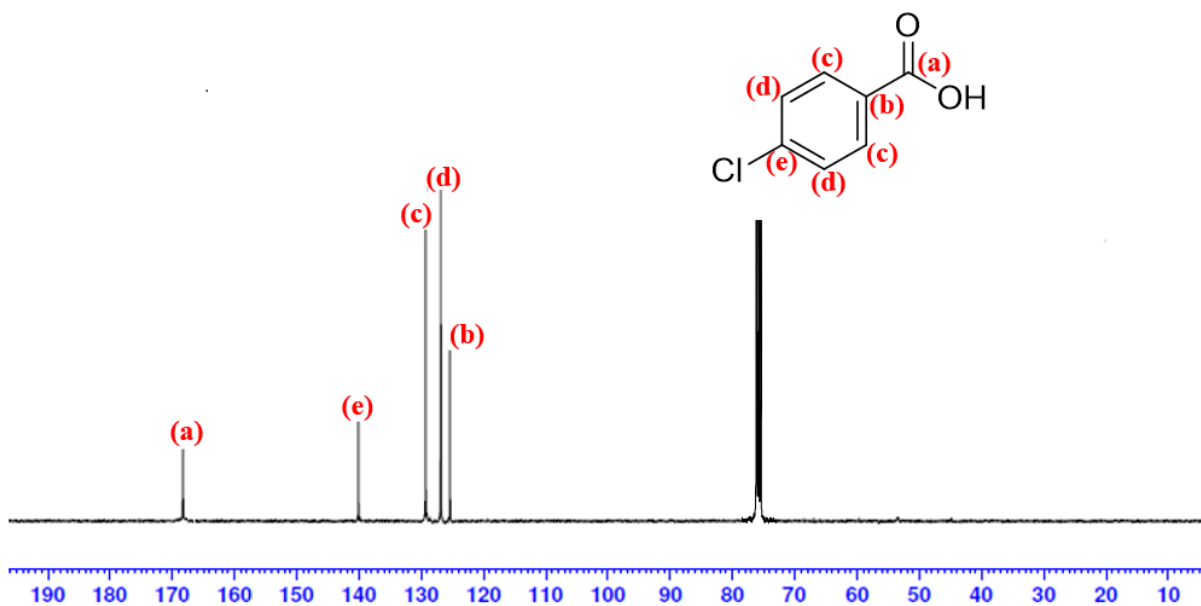

Figure S8. <sup>13</sup>C NMR spectrum of p-chlorobenzoic acid (Table 1, entry4)

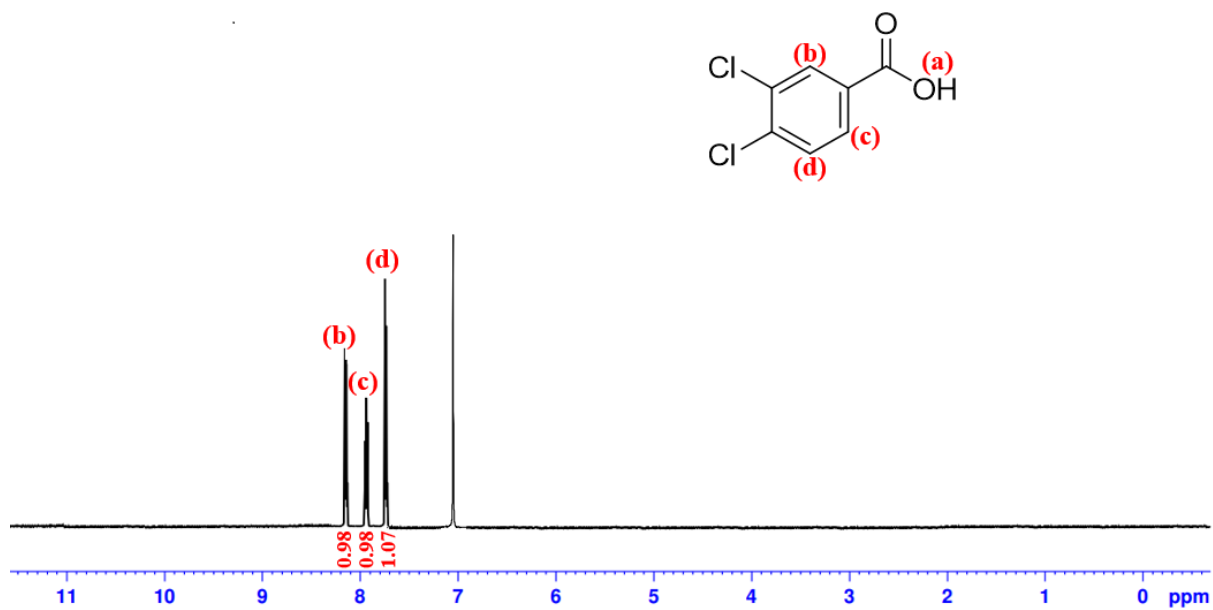

Figure S9.  $^1\text{H}$  NMR spectrum of 3,4-dichlorobenzoic acid (Table 1, entry5)

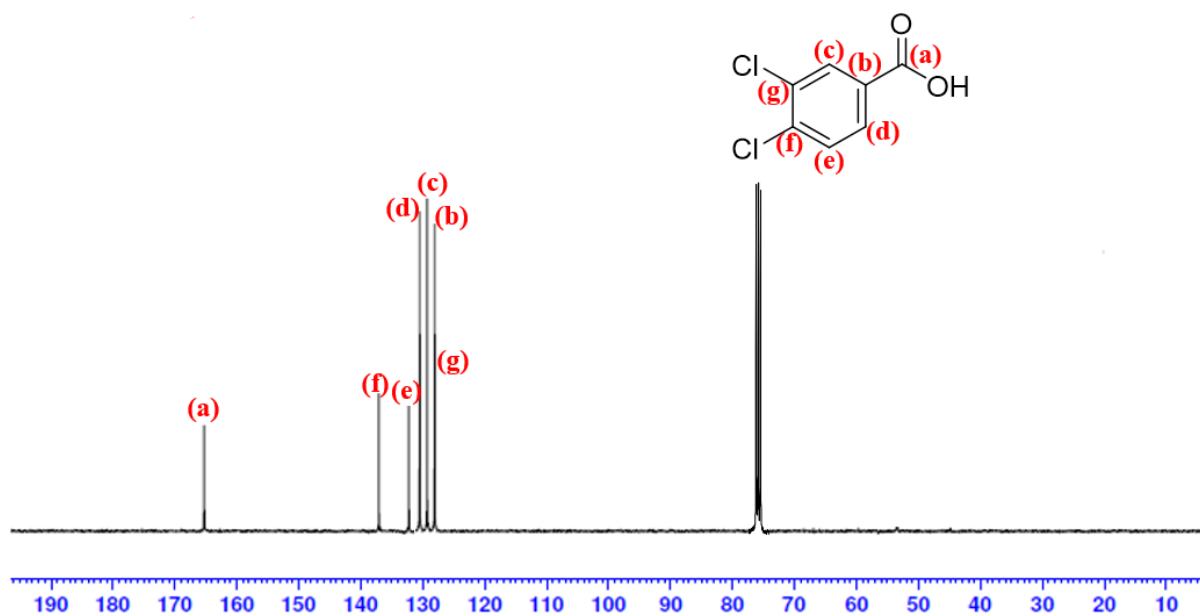

Figure S10.  $^{13}\text{C}$  NMR spectrum of 3,4-dichlorobenzoic acid (Table 1, entry5)

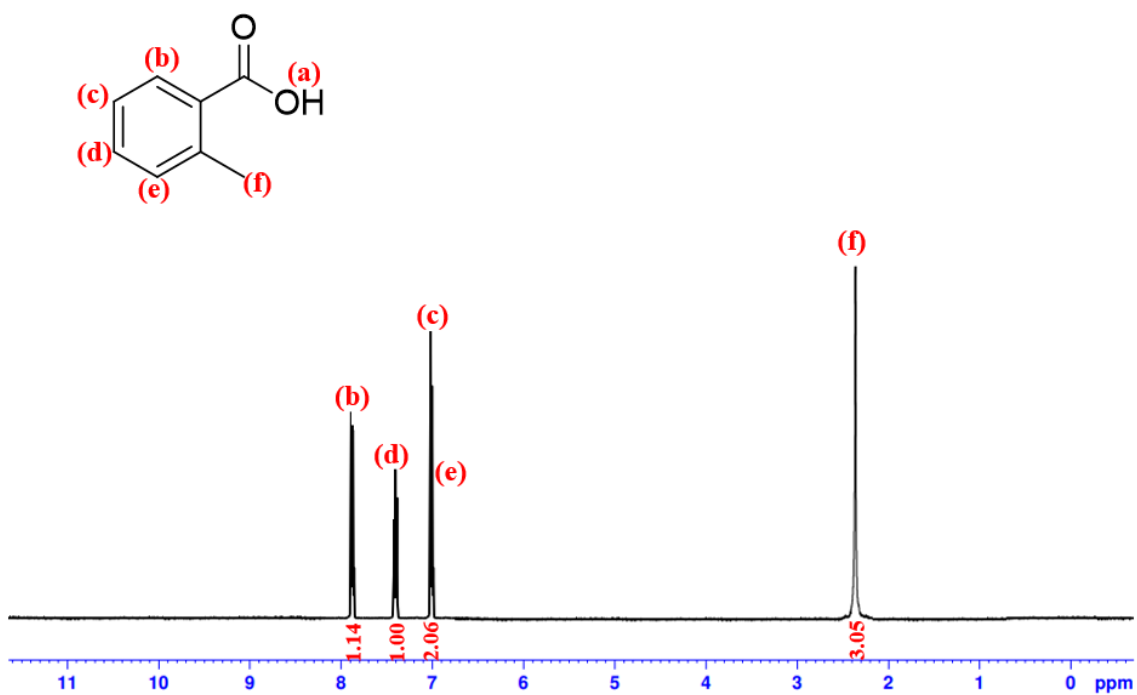

Figure S11. <sup>1</sup>H NMR spectrum of 2-methylbenzoic acid (Table 1, entry 8)

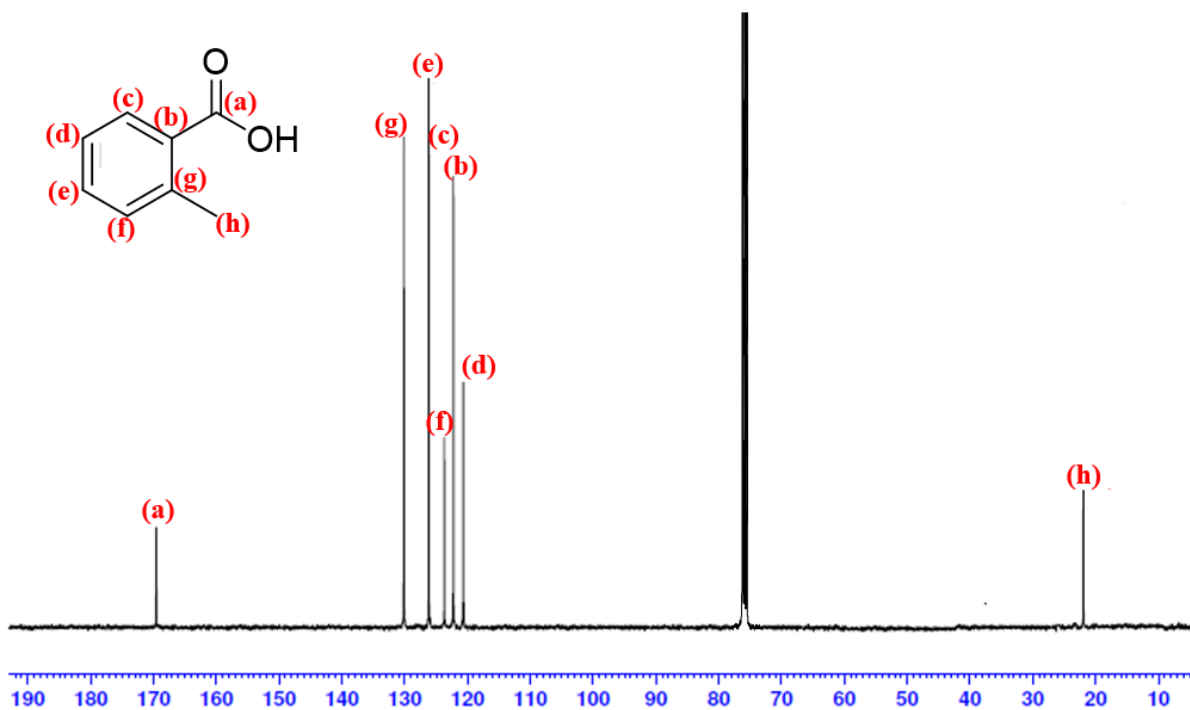

Figure S12. <sup>13</sup>C NMR spectrum of 2-methylbenzoic acid (Table 1, entry 8)

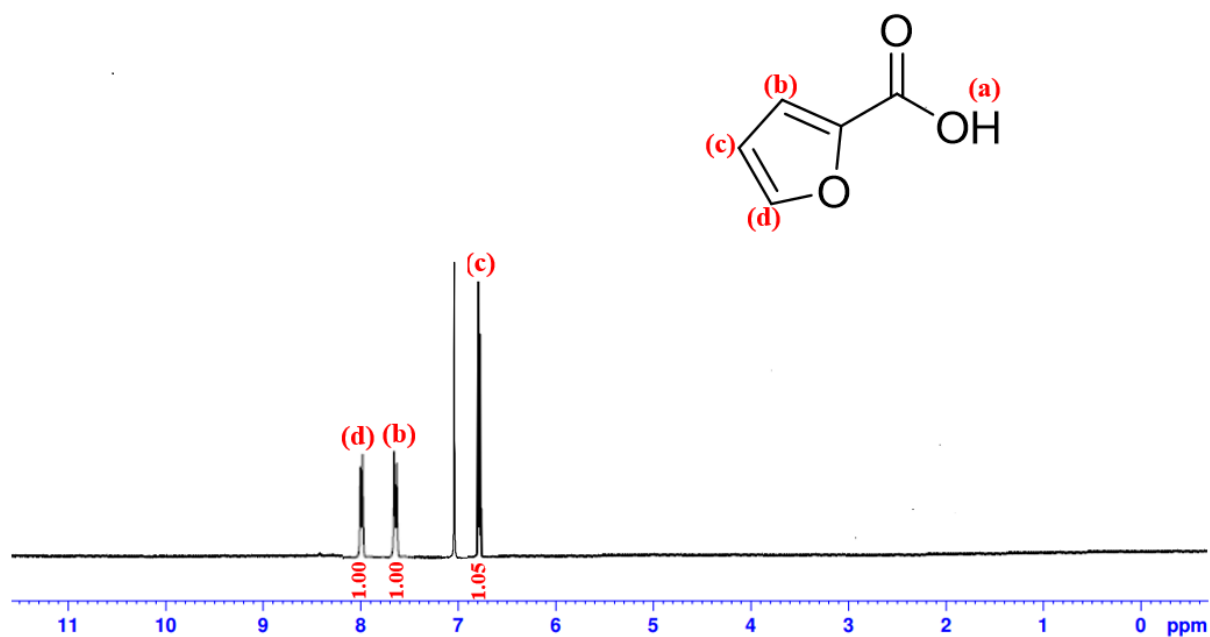

Figure S13. <sup>1</sup>H NMR spectrum of furan-2-carboxylic acid (Table 1, entry 9)

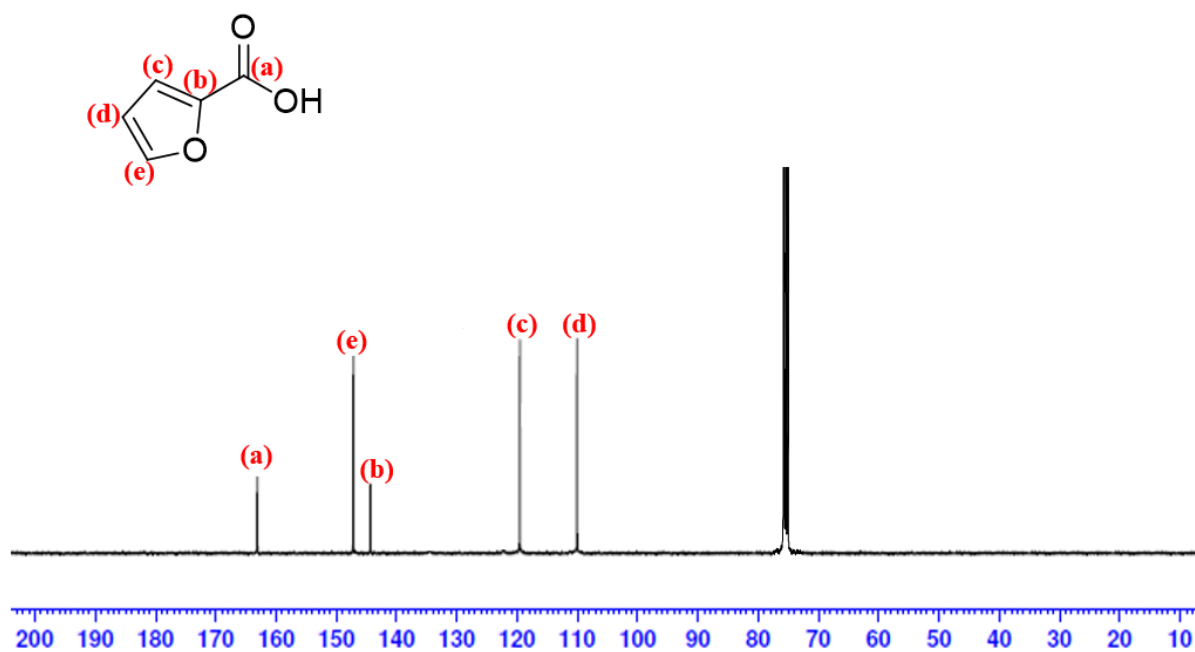

Figure S14. <sup>13</sup>C NMR spectrum of furan-2-carboxylic acid (Table 1, entry 9)



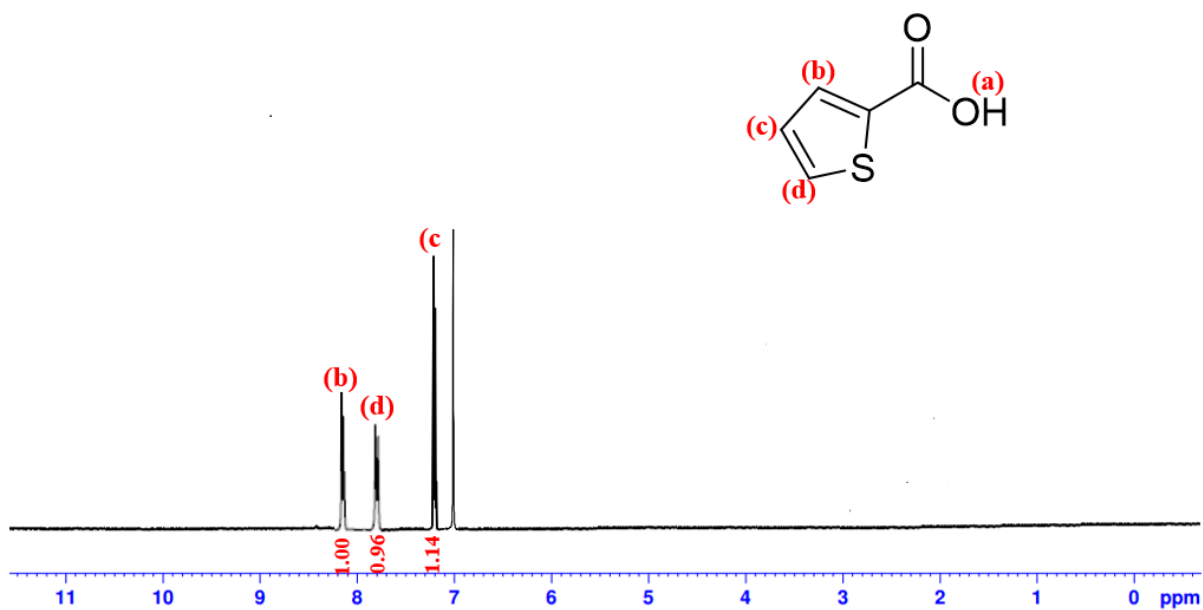

Figure S15. <sup>1</sup>H NMR spectrum of thiophene-2-carboxylic acid (Table 1, entry10)

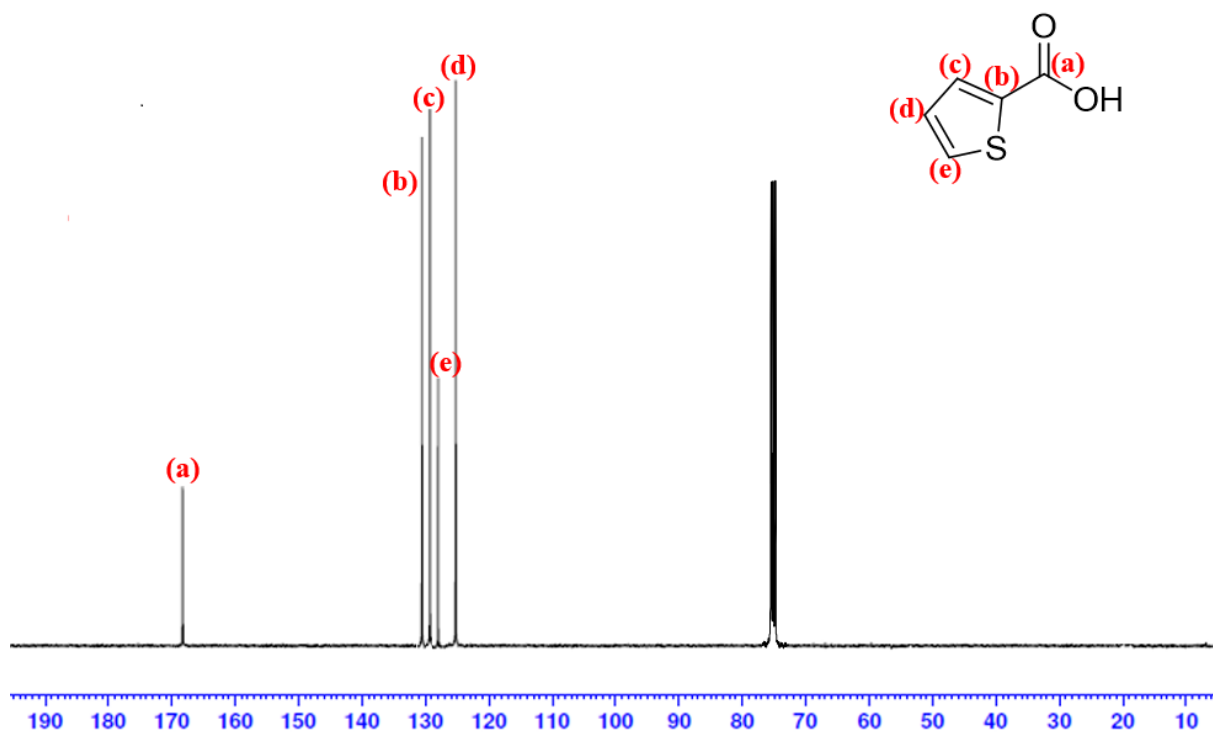

Figure S16. <sup>13</sup>C NMR spectrum of thiophene-2-carboxylic acid (Table 1, entry 10)

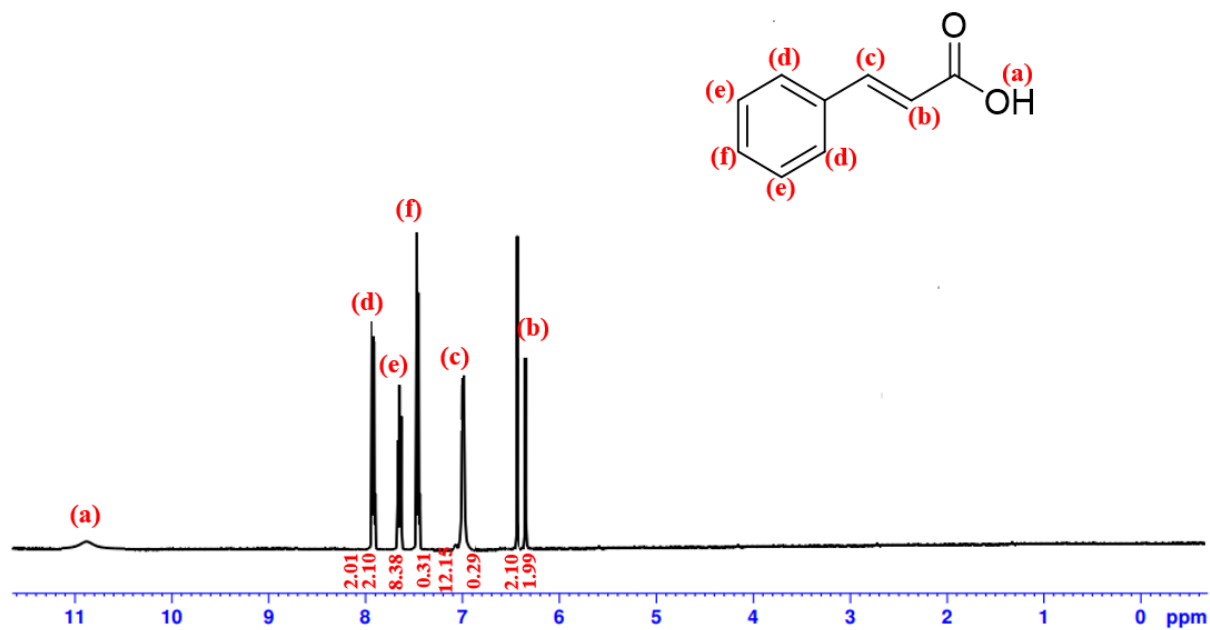

Figure S17. <sup>1</sup>H NMR spectrum of cinnamic acid (Table 1, entry11)

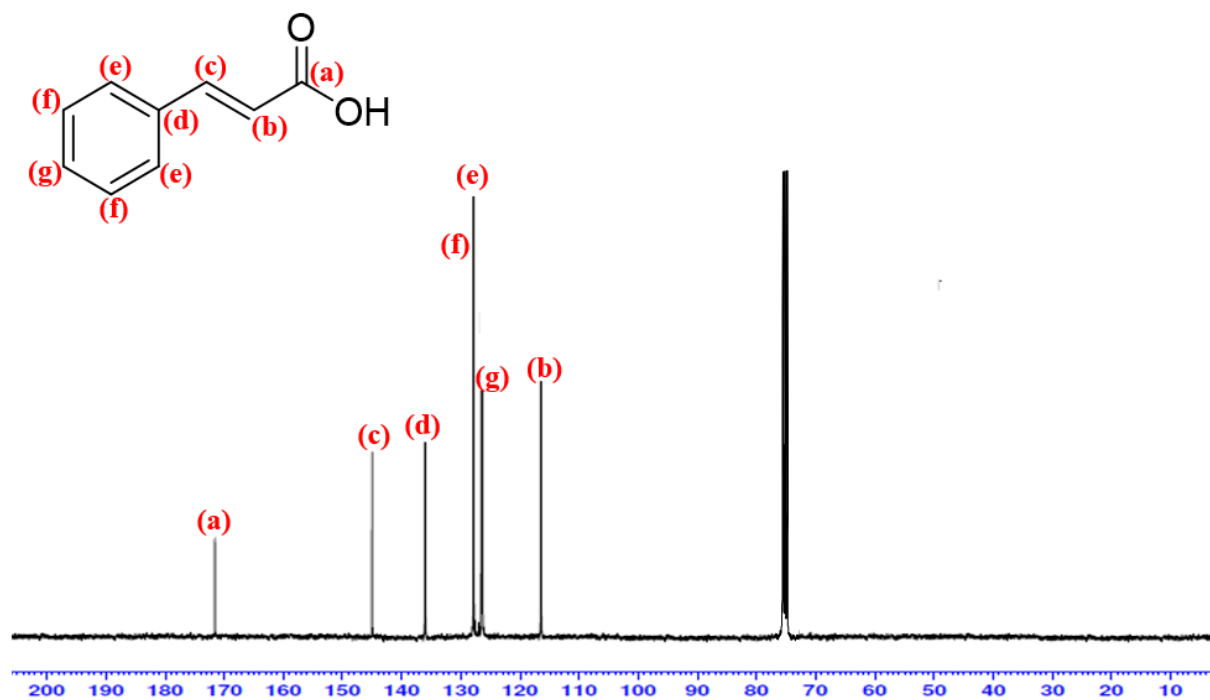

Figure S18. <sup>13</sup>C NMR spectrum of cinnamic acid (Table 1, entry11)
